# Supplementary material
Source: Frontiers journal article supplement (https://www.frontiersin.org/articles/486389)
Supplement: Table_1.XLSX [file Table_1.XLSX]

## Sheet: Sheet1
Table S1. Compilation of publications (SCOPUS searching, accessed until August 2019) that had measured DOC, DIN (ammonium and nitrate) and/or phosphate in supraglacial, subglacial and proglacial habitats (ice, snow, supraglacial streams and ponds, and cryoconite holes) on different glaciers around the world.
				Supraglacial environments analyzed					Proglacial environments analyzed
author	year	region	Subglacial	Ice	Snow	Streams	Lakes & ponds	Cryoconite holes	Streams	Lakes	Reference
Andrews	2018	Greenland	x			x					Andrews MG, Jacobson AD, Osburn MR, Flynn TM. 2018. Dissolved Carbon Dynamics in Meltwaters From the Russell Glacier, Greenland Ice Sheet. Journal of Geophysical Research: Biogeosciences. 123(9):2922-2940.
Anesio	2007	Alps						x			Anesio AM, Mindl B, Laybourn‐Parry J, Hodson AJ, Sattler B. 2007. Viral dynamics in cryoconite holes on a high Arctic glacier (Svalbard). Journal of Geophysical Research: Biogeosciences. 112(G4).
Anesio	2010	Svalbard						x			Anesio AM, Sattler B, Foreman C, Telling J, Hodson A, Tranter M, Psenner R. 2010. Carbon fluxes through bacterial communities on glacier surfaces. Annals of Glaciology. 51(56):32-40.
Anshumali	2007	India					x				Anshumali, Ramanathan AL (2007) Seasonal variation in the major chemistry of Pandoh Lake, Mandi District, Himachal Pradesh, India. Applied Geochemistry 22(8):1736–1747
Antony	2011	Antartica			x						Antony R, Mahalinganathan K, Thamban M, Nair S. 2011. Organic carbon in Antarctic snow: spatial trends and possible sources. Environ Sci Technol. 45(23):9944-9950.
Axtman	1995	Rockies					x				Axtman EV, Stallard RF (1995) Chemical weathering in the South Cascade Glacier basin, comparison of subglacial and extra-glacial weathering. In: Tonnessen KA, Williams MW, Tranter M (eds) Biogeochemistry of seasonally snow-covered catchments. IAHS Publ. No. 228, pp 431–439
Bagshaw	2007	Antarctica		x				x			Bagshaw EA, Tranter M, Fountain AG, Welch KA, Basagic H, Lyons WB. 2007. Biogeochemical evolution of cryoconite holes on Canada Glacier, Taylor Valley, Antarctica. Journal of Geophysical Research: Biogeosciences. 112(G4):n/a-n/a.
Bagshaw	2013	Svalbard						x			Bagshaw EA, Tranter M, Fountain AG, Welch K, Basagic HJ, Lyons WB. 2013. Do Cryoconite Holes have the Potential to be Significant Sources of C, N, and P to Downstream Depauperate Ecosystems of Taylor Valley, Antarctica? Arctic, Antarctic, and Alpine Research. 45(4):440-454.
		Antartica		x				x			Bagshaw EA, Tranter M, Fountain AG, Welch K, Basagic HJ, Lyons WB. 2013. Do Cryoconite Holes have the Potential to be Significant Sources of C, N, and P to Downstream Depauperate Ecosystems of Taylor Valley, Antarctica? Arctic, Antarctic, and Alpine Research. 45(4):440-454.
Barker	2006	Antartica	x	x		x					Barker JD, Sharp MJ, Fitzsimons SJ, Turner RJ. 2006. Abundance and Dynamics of Dissolved Organic Carbon in Glacier Systems. Arctic, Antarctic, and Alpine Research. 38(2):163-172.
Barker	2018	Antartica		x	x						Barker JD, Dubnick A, Lyons WB, Chin YP. 2018. Changes in Dissolved Organic Matter (DOM) Fluorescence in Proglacial Antarctic Streams. Arctic, Antarctic, and Alpine Research. 45(3):305-317.
Bastidas Navarro	2017	Andes								x	Bastidas Navarro M, Martyniuk N, Balseiro E, Modenutti B. 2017. Effect of glacial lake outburst floods on the light climate in an Andean Patagonian lake: implications for planktonic phototrophs. Hydrobiologia. 816(1):39-48.
Beaton	2017	Greenland				x					Beaton AD, Wadham JL, Hawkings J, Bagshaw EA, Lamarche-Gagnon G, Mowlem MC, Tranter M. 2017. High-Resolution in Situ Measurement of Nitrate in Runoff from the Greenland Ice Sheet. Environ Sci Technol. 51(21):12518-12527.
Bhatia	2006	Canada	x		x	x			x		Bhatia M, Sharp M, Foght J. 2006. Distinct bacterial communities exist beneath a high Arctic polythermal glacier. Appl Environ Microbiol. 72(9):5838-5845.
Bhatt	2000	Himalaya					x				Bhatt MP, Masuzawa T, Yamamoto M, Sakai A, Fujita K (2000) Seasonal changes in dissolved chemical composition and flux of melt water draining from Lirung glacier in the Nepal Himalayas. In: Proceedings of a workshop on Debris-Coved Glaciers held at Seattle, Washington, USA. IAHS Publ no 264, pp 277–288
Bhatt	2007	Himalaya					x				Bhatt MP, McDowell WH (2007) Controls on major solutes within the drainage network of a rapidly weathering tropical watershed. Water Resour Res 43:W11402.
Bhatt	2016	Himalaya					x				Bhatt MP, Takeuchi N, Acevedo MF. 2016. Chemistry of Supraglacial Ponds in the Debris-Covered Area of Lirung Glacier in Central Nepal Himalayas. Aquatic Geochemistry. 22(1):35-64.
Bowman	1992	USA			x						Bowman WD. 1992. Inputs and Storage of Nitrogen in Winter Snowpack in an Alpine Ecosystem. Arctic and Alpine Research. 24(3):211-215.
Cameron	2012	Svalbard						x			Cameron KA, Hodson AJ, Osborn AM. 2012. Carbon and nitrogen biogeochemical cycling potentials of supraglacial cryoconite communities. Polar Biology. 35(9):1375-1393.
Cameron	2017	Svalbard						x			Cameron KA, Stibal M, Chrismas N, Box J, Jacobsen CS. 2017. Nitrate addition has minimal short-term impacts on greenland ice sheet supraglacial prokaryotes. Environ Microbiol Rep. 9(2):144-150.
Clow	2002	USA			x						Clow DW, Ingersoll GP, Alisa Mast M, Turk JT, Campbell DH. 2002. Comparison of snowpack and winter wet-deposition chemistry in the RockyMountains, USA: implications for winter dry deposition. Atmospheric Environment. 36:2337-2348.
de Caritat	2005	Canada			x						de Caritat P, Hall G, Gislason S, Belsey W, Braun M, Goloubeva NI, Olsen HK, Scheie JO, Vaive JE. 2005. Chemical composition of arctic snow: concentration levels and regional distribution of major elements. Sci Total Environ. 336(1-3):183-199.
		Finlandia			x						de Caritat P, Hall G, Gislason S, Belsey W, Braun M, Goloubeva NI, Olsen HK, Scheie JO, Vaive JE. 2005. Chemical composition of arctic snow: concentration levels and regional distribution of major elements. Sci Total Environ. 336(1-3):183-199.
		Greenland			x						de Caritat P, Hall G, Gislason S, Belsey W, Braun M, Goloubeva NI, Olsen HK, Scheie JO, Vaive JE. 2005. Chemical composition of arctic snow: concentration levels and regional distribution of major elements. Sci Total Environ. 336(1-3):183-199.
		Iceland			x						de Caritat P, Hall G, Gislason S, Belsey W, Braun M, Goloubeva NI, Olsen HK, Scheie JO, Vaive JE. 2005. Chemical composition of arctic snow: concentration levels and regional distribution of major elements. Sci Total Environ. 336(1-3):183-199.
		Norway			x						de Caritat P, Hall G, Gislason S, Belsey W, Braun M, Goloubeva NI, Olsen HK, Scheie JO, Vaive JE. 2005. Chemical composition of arctic snow: concentration levels and regional distribution of major elements. Sci Total Environ. 336(1-3):183-199.
		Russia			x						de Caritat P, Hall G, Gislason S, Belsey W, Braun M, Goloubeva NI, Olsen HK, Scheie JO, Vaive JE. 2005. Chemical composition of arctic snow: concentration levels and regional distribution of major elements. Sci Total Environ. 336(1-3):183-199.
		Sweden			x						de Caritat P, Hall G, Gislason S, Belsey W, Braun M, Goloubeva NI, Olsen HK, Scheie JO, Vaive JE. 2005. Chemical composition of arctic snow: concentration levels and regional distribution of major elements. Sci Total Environ. 336(1-3):183-199.
		Alaska			x						de Caritat P, Hall G, Gislason S, Belsey W, Braun M, Goloubeva NI, Olsen HK, Scheie JO, Vaive JE. 2005. Chemical composition of arctic snow: concentration levels and regional distribution of major elements. Sci Total Environ. 336(1-3):183-199.
		Svalbard			x						de Caritat P, Hall G, Gislason S, Belsey W, Braun M, Goloubeva NI, Olsen HK, Scheie JO, Vaive JE. 2005. Chemical composition of arctic snow: concentration levels and regional distribution of major elements. Sci Total Environ. 336(1-3):183-199.
Doxsey-Whitfield	2012	Canada Rockie				x					Doxsey-Whitfield E. 2012. Magnitude and controls of microbial nitrate production in the streams and till of a glaciated alpine catchment, Canadian Rocky Mountains, Alberta.
Dubnick	2017	Antartica		x	x	x	x	x			Dubnick A, Wadham J, Tranter M, Sharp M, Orwin J, Barker J, Bagshaw E, Fitzsimons S. 2017. Trickle or treat: The dynamics of nutrient export from polar glaciers. Hydrological Processes. 31(9):1776-1789.
Fegel	2016	Rockies		x							Fegel TS, Baron JS, Fountain AG, Johnson GF, Hall EK. 2016. The differing biogeochemical and microbial signatures of glaciers and rock glaciers. Journal of Geophysical Research: Biogeosciences. 121(3):919-932.
Fellman	2015	Alaska			x						Fellman J, Hood E, Raymond PA, Hudson J, Bozeman M, Arimitsu M. 2015. Evidence for the assimilation of ancient glacier organic carbon in a proglacial stream food web. Limnology & Oceanography. 60(4):1118-1128.
Feng	2017	Tibetan Plateau		x				x			Feng L, An Y, Xu J, Kang S, Li X, Zhou Y, Zhang Y, Jiang B, Liao Y. 2017. Physical and chemical evolution of dissolved organic matter across the ablation season on a glacier in the central Tibetan Plateau. Biogeosciences Discussions.1-38.
Foreman	2007	Antarctica						x			Foreman CM, Sattler B, Mikucki JA, Porazinska DL, Priscu JC. 2007. Metabolic activity and diversity of cryoconites in the Taylor Valley, Antarctica. Journal of Geophysical Research: Biogeosciences. 112(G4):n/a-n/a.
Foreman	2013	Antartica				x					Foreman CM, Cory RM, Morris CE, SanClements MD, Smith HJ, Lisle JT, Miller PL, Chin Y-P, McKnight DM. 2013. Microbial growth under humic-free conditions in a supraglacial stream system on the Cotton Glacier, Antarctica. Environmental Research Letters. 8(3).
Garcia-Lopez	2019	Svalvard		x							Garcia-Lopez E, Rodriguez-Lorente I, Alcazar P, Cid C. 2019. Microbial Communities in Coastal Glaciers and Tidewater Tongues of Svalbard Archipelago, Norway. Frontiers in Marine Science. 5.
Grannas	2004	Greenland			x						Grannas AM, Shepson PB, Filley T. 2004. Photochemistry and nature of organic matter in Arctic and Antarctic snow. Journal of Global Biogeochemical Cycles. 18(1).
Grzesiak	2015	Svalbard		x				x			Grzesiak J, Gorniak D, Swiatecki A, Aleksandrzak-Piekarczyk T, Szatraj K, Zdanowski MK. 2015. Microbial community development on the surface of Hans and Werenskiold Glaciers (Svalbard, Arctic): a comparison. Extremophiles. 19(5):885-897.
Hagler	2007	Greenland			x						Hagler GSW, Bergin MH, Smith EA, Dibb JE, Anderson C, Steig EJ. 2007. Particulate and water-soluble carbon measured in recent snow at Summit, Greenland. Geophysical Research Letters. 34(16).
Hamilton	2017	Rockies		x	x						Hamilton TL, Havig J. 2017. Primary productivity of snow algae communities on stratovolcanoes of the Pacific Northwest. Geobiology. 15(2):280-295.
Havig	2019	Rockies	x								Havig JR, Hamilton TL. 2019. Snow algae drive productivity and weathering at volcanic rock-hosted glaciers. Geochimica et Cosmochimica Acta. 247:220-242.
Hawkings	2016	Greenland				x					Hawkings J, Wadham J, Tranter M, Telling J, Bagshaw E, Beaton A, Simmons S-L, Chandler D, Tedstone A, Nienow P. 2016. The Greenland Ice Sheet as a hot spot of phosphorus weathering and export in the Arctic. Global Biogeochemical Cycles. 30(2):191-210.
Hemingway	2019	Himalaya							x		Hemingway JD, Spencer RGM, Podgorski DC, Zito P, Sen IS, Galy VV. 2019. Glacier meltwater and monsoon precipitation drive Upper Ganges Basin dissolved organic matter composition. Geochimica et Cosmochimica Acta. 244:216-228.
Hodson	2006	Alps			x						Hodson A. 2006. Phosphorus in glacial meltwaters. Glacier science and environmental change.
Holland	2019	Greenland Ice Sheet		x				x			Holland AT, Williamson CJ, Sgouridis F, Tedstone AJ, McCutcheon J, Cook JM, Poniecka E, Yallop ML, Tranter M, Anesio AM. 2019. Nutrient cycling in supraglacial environments of the Dark Zone of the Greenland Ice Sheet. Biogeosciences Discussions.1-22.
		Antartica				x					Holland AT, Williamson CJ, Sgouridis F, Tedstone AJ, McCutcheon J, Cook JM, Poniecka E, Yallop ML, Tranter M, Anesio AM. 2019. Nutrient cycling in supraglacial environments of the Dark Zone of the Greenland Ice Sheet. Biogeosciences Discussions.1-22.
Hood	2009	Alaska							x		Hood E, Berner L. 2009. Effects of changing glacial coverage on the physical and biogeochemical properties of coastal streams in southeastern Alaska. Journal of Geophysical Research. 114(G3).
Hood	2015	Antarctica	x	x				x			Hood E, Battin T, Fellman J, O'Neel S, Spencer R. 2015. Storage and release of organic carbon from glaciers and ice sheets. Nature Geoscience. 8:91-96.
Kang	2004	Himalaya			x						Kang, S.C., Mayewski, P.A., Qin, D.H., Sneed, S.R., Ren, J.W., Zhang, D.Q., 2004. Seasonal differences in snow chemistry from the vicinity of Mt. Everest, central Himalayas. Atmospheric Environment 38, 2819-2829
Khan	2017	Greenland			x						Khan AL, Wagner S, Jaffe R, Xian P, Williams M, Armstrong R, McKnight D. 2017. Dissolved black carbon in the global cryosphere: Concentrations and chemical signatures. Geophysical Research Letters. 44(12):6226-6234.
		Andes			x						Khan AL, Wagner S, Jaffe R, Xian P, Williams M, Armstrong R, McKnight D. 2017. Dissolved black carbon in the global cryosphere: Concentrations and chemical signatures. Geophysical Research Letters. 44(12):6226-6234.
		Svalbard			x						Khan AL, Wagner S, Jaffe R, Xian P, Williams M, Armstrong R, McKnight D. 2017. Dissolved black carbon in the global cryosphere: Concentrations and chemical signatures. Geophysical Research Letters. 44(12):6226-6234.
		Greenland				x					Khan AL, Wagner S, Jaffe R, Xian P, Williams M, Armstrong R, McKnight D. 2017. Dissolved black carbon in the global cryosphere: Concentrations and chemical signatures. Geophysical Research Letters. 44(12):6226-6234.
		Himalaya					x				Khan AL, Wagner S, Jaffe R, Xian P, Williams M, Armstrong R, McKnight D. 2017. Dissolved black carbon in the global cryosphere: Concentrations and chemical signatures. Geophysical Research Letters. 44(12):6226-6234.
Koziol	2014	Svalbard		x	x						Koziol K, Kozak K, Polkowska Z. 2014. Superimposed Ice as Nutrient Storage. International Proceedings of Chemical, Biological and Environmental Engineering. DOI: 10.7763/IPCBEE. 2014. V69. 4
Kreutz	2001	China		x							Kreutz, K., Aizen, V., DeWayne Cecil, L., & Wake, C. (2001). Oxygen isotopic and soluble ionic composition of a shallow firn core, Inilchek glacier, central Tien Shan. Journal of Glaciology, 47(159), 548-554. doi:10.3189/172756501781831819
Lawson	2014	Greenland	x	x				x			Lawson EC, Wadham JL, Tranter M, Stibal M, Lis GP, Butler CEH, Laybourn-Parry J, Nienow P, Chandler D, Dewsbury P. 2014. Greenland Ice Sheet exports labile organic carbon to the Arctic oceans. Biogeosciences. 11(14):4015-4028.
Legrand	1997	Greenland			x						Legrand, M. and Mayewski, P.: Glaciochemistry of polar ice cores: A review, Rev.Geophys., 35, 219–243, 1997.
Legrand	2007	Antartica		x							Legrand, M. and Puxbaum, H.: Summary of the CARBOSOL project: Present and retrospective state of organic versus inorganic aerosol over Europe, J. Geophys. Res., 112, DS23S01, doi:10.1029/2006JD008271, 2007.
Legrand	2013	Antartica		x	x						Legrand M, Preunkert S, Jourdain B, Guilhermet J, Fan X, Alekhina I, Petit JR. 2013. Water-soluble organic carbon in snow and ice deposited at Alpine, Greenland, and Antarctic sites: a critical review of available data and their atmospheric relevance. Climate of the Past. 9(5):2195-2211.
		Alps			x						Legrand M, Preunkert S, Jourdain B, Guilhermet J, Fan X, Alekhina I, Petit JR. 2013. Water-soluble organic carbon in snow and ice deposited at Alpine, Greenland, and Antarctic sites: a critical review of available data and their atmospheric relevance. Climate of the Past. 9(5):2195-2211.
Li	2009	China			x						Li Z, He Y, Pang H, Jia W, He X, Zhang N, Ning B, Yuan L, Song B, Theakstone W. 2009. Chemistry of snow deposited during the summer monsoon and in the winter season at Baishui glacier No. 1, Yulong mountain, China. Journal of Glaciology. 55(190):221-228.
Marinoni	2001	Nepal			x						Marinoni, A., Polesello, S., Smirraglia, C., Valssecchi, S., 2001. Chemical composition of fresh snow samples from the southern slope of Mt. Everest region (KhumbuHimal region, Nepal). Atmospheric Environment 35, 3183e3190.
Martyniuk	2014	Andes						x			Martyniuk N, Modenutti B, Balseiro E. 2014. Can increased glacial melting resulting from global change provide attached algae with transient protection against high irradiance? Freshwater Biology. 59(11):2290-2302.
Mayewski	1984	India			x						Mayewski, P.A., Ahmad, N., Gordon, S., Pourchet, M., 1984. Interpretation of the Chemical and Physical Time-series Retrieved from Sentik Glacier, Ladakh Himalaya, Indian. Earth Science Faculty Scholarship, p. 181.
Miserendino	2018	Andes						x			Miserendino ML, Brand C, Epele LB, Di Prinzio CY, Omad GH, Archangelsky M, Martinez O, Kutschker AM. 2018. Biotic diversity of benthic macroinvertebrates at contrasting glacier-fed systems in Patagonia Mountains: The role of environmental heterogeneity facing global warming. Science of The Total Environment. 622-623:152-163.
Modenutti	2013	Andes								x	Modenutti, B, E. Balseiro, M. Bastidas Navarro, C. Laspoumaderes, M.S. Souza y F. Cuassolo. 2013. Environmental changes affecting light climate in oligotrophic mountain lakes: the Deep Chlorophyll Maxima as a sensitive variable Aquatic Sciences, 75:361-371
Modenutti	2018	Andes		x							Modenutti B, Bastidas Navarro M, Martyniuk N, Balseiro E. 2018. Melting of clean and debris-rich ice differentially affect nutrients, dissolved organic matter and bacteria respiration in the early ontogeny of the newly formed proglacial Ventisquero Negro Lake (Patagonia Argentina). Freshwater Biology. 63(11):1341-1351.
Mueller	2001	Antartica				x					Mueller D, Vincent WF, Pollard WH, Fritsen CH. 2001. Glacial cryoconite ecosystems: A bipolar comparison of algal communities and habitats. Nova Hedwigia. 123:173-197.
		Canada				x					Mueller D, Vincent WF, Pollard WH, Fritsen CH. 2001. Glacial cryoconite ecosystems: A bipolar comparison of algal communities and habitats. Nova Hedwigia. 123:173-197.
Musselman	1996	Rockies					x				Musselman RC, Hudnell L, Williams MW, Summerfeld RA (1996) Water chemistry of rocky mountain front range aquatic ecosystems. Research Paper RM-RP-325, USDA Forest Service, Fort Collins, CO, USA, p 13
Nawrot	2016	Svalbard			x						Nawrot AP, Migała K, Luks B, Pakszys P, Głowacki P. 2016. Chemistry of snow cover and acidic snowfall during a season with a high level of air pollution on the Hans Glacier, Spitsbergen. Polar Science. 10(3):249-261.
Niu	2013	Tibetan Plateau			x						Niu H, He Y, Zhu G, Xin H, Du J, Pu T, Lu X, Zhao G. 2013. Environmental implications of the snow chemistry from Mt. Yulong, southeastern Tibetan Plateau. Quaternary International. 313-314:168-178.
Niu	2016	Tibetan Plateau		x							Niu, H.W., He, Y.Q., Kang, S.C., 2016. Chemical compositions ofsnow fromMt. Yulong, southeastern Tibetan Plateau. J. Earth Syst. Sci. 125 (2), 403–416.
Niu	2017	Tibetan Plateau		x	x		x				Niu H, Kang S, Shi X, He Y, Lu X, Shi X, Paudyal R, Du J, Wang S, Du J et al. 2017. Water-soluble elements in snow and ice on Mt. Yulong. Sci Total Environ. 574:889-900.
Olivier	2003	Siberia		x							Olivier S. 2003. Glaciochemical investigation of an ice core from Belukha glacier, Siberian Altai. Geophysical Research Letters. 30(19).
Oyabu	2016	Greenland			x						Oyabu I, Matoba S, Yamasaki T, Kadota M, Iizuka Y. 2016. Seasonal variations in the major chemical species of snow at the South East Dome in Greenland. Polar Science. 10(1):36-42.
Peter & Sommaruga	2016	Alps								x	Peter, H., & Sommaruga, R. (2016). Shifts in diversity and function of lake bacterial communities upon glacier retreat. The ISME journal, 10(7), 1545.
Porazinska	2004	Antarctica						x			Porazinska D, Fountain A, Nylen T, Tranter M, Virginia RA, Wall DH. 2004. The Biodiversity and Biogeochemistry of Cryoconite Holes from McMurdo Dry Valley Glaciers, Antarctica. Arctic, Antarctic, and Alpine Research. 36(1):84-91.
Preunkert	2011	Antartica		x							Preunkert, S., Legrand, M., Stricker, P., Bulat, S., Alekhina, I., Petit, J. R., Hoffmann, H., May, B., and Jourdain B.: Quantification of Dissolved Organic Carbon at very low levels in natural ice samples by a UV induced oxidation method, Environ. Sci. Technol., 45, 673–678, 2011.
Reynolds	1995	Himalaya					x				Reynolds B, Chapman PJ, French MC, Jenkin A, Wheater HS (1995) Major, minor and trace element chemistry of surface waters in the Everest region of Nepal. In: Tonnessen KA, Williams MW, Tranter M (eds) Biogeochemistry of seasonally snow-covered catchments. IAHS Publ no 228, pp 405–412
Rime	2016	Alps	x	x	x	x					Rime T, Hartmann M, Frey B. 2016. Potential sources of microbial colonizers in an initial soil ecosystem after retreat of an alpine glacier. ISME J. 10(7):1625-1641.
Rinke	2001	Alps							x		Rinke K, Robinson CT, Uehlinger U. 2001. A note on abiotic factors that constrain periphyton growth in alpine glacier streams. International Review of Hydrobiology. 86(3):361-366.
Rose	2014	Rockies								x	Rose, K. C., Hamilton, D. P., Williamson, C. E., McBride, C. G., Fischer, J. M., Olson, M. H., ... & Cabrol, N. (2014). Light attenuation characteristics of glacially‐fed lakes. Journal of Geophysical Research: Biogeosciences, 119(7), 1446-1457.
Sanclements	2016	Antartica				x					SanClements MD, Smith HJ, Foreman CM, Tedesco M, Chin Y-P, Jaros C, McKnight DM. 2016. Biogeophysical properties of an expansive Antarctic supraglacial stream. Antarctic Science. 29(1):33-44.
Sanyal	2018	Himalaya						x			Sanyal A, Antony R, Samui G, Thamban M. 2018. Microbial communities and their potential for degradation of dissolved organic carbon in cryoconite hole environments of Himalaya and Antarctica. Microbiol Res. 208:32-42.
		Antarctica						x			Sanyal A, Antony R, Samui G, Thamban M. 2018. Microbial communities and their potential for degradation of dissolved organic carbon in cryoconite hole environments of Himalaya and Antarctica. Microbiol Res. 208:32-42.
Säwström	2007	Svalbard					x	x			Säwström C, Laybourn-Parry J, Granéli W, Anesio AM. 2007. Heterotrophic bacterial and viral dynamics in Arctic freshwaters: Results from a field study and nutrient-temperature manipulation experiments [Article]. Polar Biology. 30(11):1407-1415.
Saros	2010	Rockies								x	Saros, J. E., Rose, K. C., Clow, D. W., Stephens, V. C., Nurse, A. B., Arnett, H. A., ... & Wolfe, A. P. (2010). Melting alpine glaciers enrich high-elevation lakes with reactive nitrogen. Environmental science & technology, 44(13), 4891-4896.
Scott	2010	Alaska				x			x		Scott D, Hood E, Nassry M. 2010. In-stream uptake and retention of C, N and P in a supraglacial stream. Annals of Glaciology. 51(56):80-85.
Singer	2012	Alps		x							Singer GA, Fasching C, Wilhelm L, Niggemann J, Steier P, Dittmar T, Battin TJ. 2012. Biogeochemically diverse organic matter in Alpine glaciers and its downstream fate. Nature Geoscience. 5(10):710.
Skidmore	2005	Alaska	x	x		x					Skidmore M, Anderson SP, Sharp M, Foght J, Lanoil BD. 2005. Comparison of microbial community compositions of two subglacial environments reveals a possible role for microbes in chemical weathering processes. Appl Environ Microbiol. 71(11):6986-6997.
Slemmons	2012	Alps									Slemmons KEH, Saros JE. 2012. Implications of nitrogen-rich glacial meltwater for phytoplankton diversity and productivity in alpine lakes. Limnology and Oceanography. 57(6):1651-1663.
Smith	2017	Antartica				x					Smith H, Foster RA, McKnight D, Lisle JT, Littmann S, Kuypers MMM, Foreman CM. 2017. Microbial formation of labile organic carbon in Antarctic glacial environments. Nature Geoscience.
Spencer	2014	Tibetan Plateau		x							Spencer RGM, Vermilyea A, Fellman J, Raymond P, Stubbins A, Scott D, Hood E. 2014. Seasonal variability of organic matter composition in an Alaskan glacier outflow: insights into glacier carbon sources. Environmental Research Letters. 9(5).
		Alaska			x						Spencer RGM, Vermilyea A, Fellman J, Raymond P, Stubbins A, Scott D, Hood E. 2014. Seasonal variability of organic matter composition in an Alaskan glacier outflow: insights into glacier carbon sources. Environmental Research Letters. 9(5).
Stanish	2013	Antarctica						x			Stanish LF, Bagshaw EA, McKnight DM, Fountain AG, Tranter M. 2013. Environmental factors influencing diatom communities in Antarctic cryoconite holes. Environmental Research Letters. 8(4).
Stibal	2008	Svalbard				x		x			Stibal M, Tranter M, Telling J, Benning LG. 2008. Speciation, phase association and potential bioavailability of phosphorus on a Svalbard glacier. Biogeochemistry. 90(1):1-13.
Stibal	2009	Svalbard				x					Stibal M, Anesio AM, Blues CJD, Tranter M. 2009. Phosphatase activity and organic phosphorus turnover on a high Arctic glacier. Biogeosciences. 6:913-922.
Stubbins	2012	Alaska			x						Stubbins A, Hood E, Raymond PA, Aiken GR, Sleighter RL, Hernes PJ, Butman D, Hatcher PG, Striegl RG, Schuster P et al. 2012. Anthropogenic aerosols as a source of ancient dissolved organic matter in glaciers. Nature Geoscience. 5(3):198-201.
Tartari	1998	Himalaya					x				Tartari GA, Tartari G, Mosello R (1998) Water chemistry of high altitude lakes in the Khumbu and Imja Khola Valleys (Nepalese Himalayas). Mem Ist Ital Idrobiol 57:51–76
Telling	2012	Greenland		x	x						Telling J, Stibal M, Anesio AM, Tranter M, Nias I, Cook J, Bellas C, Lis G, Wadham JL, Sole A et al. 2012. Microbial nitrogen cycling on the Greenland Ice Sheet. Biogeosciences. 9(7):2431-2442.
Telling	2014	Antartica		x				x			Telling J, Anesio AM, Tranter M, Fountain AG, Nylen T, Hawkings J, Singh VB, Kaur P, Musilova M, Wadham JL. 2014. Spring thaw ionic pulses boost nutrient availability and microbial growth in entombed Antarctic Dry Valley cryoconite holes. Front Microbiol. 5:694.
Tockner	2002	Alps			x						Tockner, K., Malard, F., Uehlinger, U. & Ward, J. V. Nutrients and organic matter in a glacial river-floodplain system (Val Roseg, Switzerland). Limnol. Oceanogr. 47, 266–277 (2002)
Twickler	1986	Greenland			x						Twickler, M. S., M. J. Spencer, W. B. Lyons, and P. A. Mayewski. 1986. Measurement of organic carbon in polar snow samples. Nature 320:156–157
Vega	2015	Svalbard			x						Vega CP, Björkman MP, Pohjola VA, Isaksson E, Pettersson R, Martma T, Marca A, Kaiser J. 2015. Nitrate stable isotopes and major ions in snow and ice samples from four Svalbard sites. Polar Research. 34(1).
Wadham	2016	Greenland	x	x							Wadham JL, Hawkings J, Telling J, Chandler D, Alcock J, amp, apos, Donnell E, Kaur P, Bagshaw E et al. 2016. Sources, cycling and export of nitrogen on the Greenland Ice Sheet. Biogeosciences. 13(22):6339-6352.
Wang	2007	China		x							Wang, Y., Choi, Y., Zeng, T., Davis, D., Buhr, M., Huey, G. L., and Neff, W., 2007. Assessing the photochemical impact of snow NOx emissions over Antarctica during ANTCI 2003, Atmospheric Environment 41, 3944-3958.
Warner	2017	Rockies								x	Warner, K. A., Saros, J. E., & Simon, K. S. (2017). Nitrogen Subsidies in Glacial Meltwater: Implications for High Elevation Aquatic Chains. Water Resources Research, 53, 9791–9806.
Wilhelm	2013	Alps							x		Wilhelm, L., Singer, G.A., Fasching, C., Battin, T.J., and Besemer, K. ( 2013) Microbial biodiversity in glacier‐fed streams. ISME J 7: 1651– 1660.
Williams	2007	USA	x		x					x	Williams, M. W., M. Knauf, R. Cory, N. Caine, and F. Liu (2007), Nitrate content and potential microbial signature of rock glacier outflow, Colorado Front Range, Earth Surf. Processes Landforms, 32(7), 1032–1047.
Wolff	2013	Greenland		x							Wolff EW. 2013. Ice sheets and nitrogen. Philos Trans R Soc Lond B Biol Sci. 368(1621):20130127.
Wynn	2007	Svalbard	x		x	x			x		Wynn PM, Hodson AJ, Heaton THE, Chenery SR. 2007. Nitrate production beneath a High Arctic glacier, Svalbard. Chemical Geology. 244(1-2):88-102.
Xu	2013	Himalaya			x						Xu J, Zhang Q, Li X, Ge X, Xiao C, Ren J, Qin D. 2013. Dissolved organic matter and inorganic ions in a central Himalayan glacier--insights into chemical composition and atmospheric sources. Environ Sci Technol. 47(12):6181-6188.
Yalcin	2006	Alaska			x						Yalcin, K.; Wake, C. P.; Dibb, J. E.; Whitlow, S. I. Relationships between aerosol and snow chemistry at King Col, Mt. Logan Massif, Yukon, Canada. Atmos. Environ. 2006, 40 (37), 7152−7163.
Yan	2015	Tibetan Plateau			x						Yan F-p, Kang S-c, Chen P-f, Bai J-k, Li Y, Hu Z-f, Li C-l. 2015. Concentration and Source of Dissolved Organic Carbon in Snowpits of the Tibetan Plateau. Environmental Science. 36(8):2827-2832.
		Tibetan Plateau		x	x						Yan F-p, Kang S-c, Chen P-f, Bai J-k, Li Y, Hu Z-f, Li C-l. 2015. Concentration and Source of Dissolved Organic Carbon in Snowpits of the Tibetan Plateau. Environmental Science. 36(8):2827-2832.
Zarsky	2013	Svalbard		x				x			Zarsky JD, Stibal M, Hodson A, Sattler B, Schostag M, Hansen LH, Jacobsen CS, Psenner R. 2013. Large cryoconite aggregates on a Svalbard glacier support a diverse microbial community including ammonia-oxidizing archaea. Environmental Research Letters. 8(3).
Zeman	1975	Canada Rockies			x						Zeman LJ, Slaymaker O. 1975. Hydrochemical Analysis to Discriminate Variable Runoff Source Areas in an Alpine Basin. Arctic and Alpine Research. 7(4):341-351.
Zhu	2012	China			x						Zhu, G.F.,Pu, T.,He, Y.Q.,Shi,P.J., Zhang, T.,2012. Seasonal variations of major ions in fresh snow at Baishui Glacier No. 1, Yulong Mountain, China. Environmental Earth Sciences. http://dx.doi.org/10.1007/s12665012-1928-0.
